# Supplementary material for: Generation of Fad2 and Fad3 transgenic mice that produce n-6 and n-3 polyunsaturated fatty acids
Source: PubMed Central journal article supplement (PMC6833225; doi:10.1098/rsob.190140), 2019-10-23
Supplement: rsob190140supp1.pdf [file rsob190140supp1.pdf]

## Electronic supplementary material

(a)

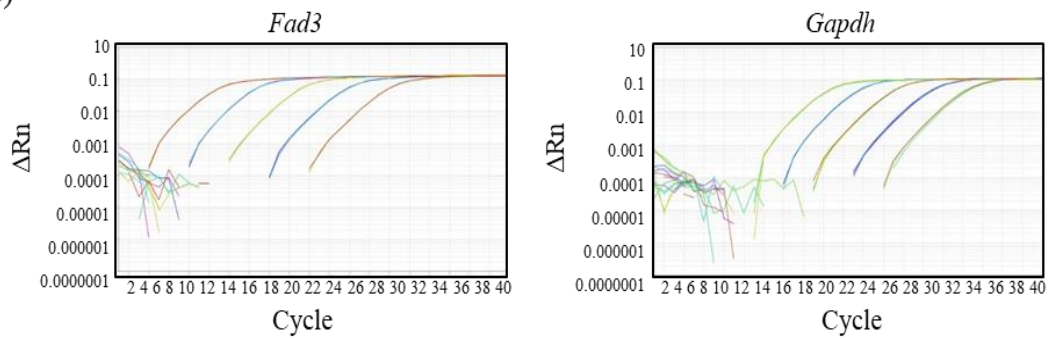

(b)

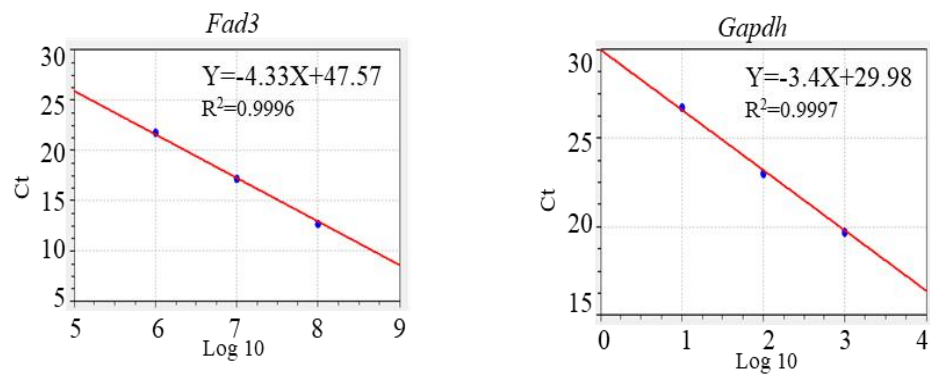

**Figure S1. Standard curve of *Fad3* and *Gapdh*.**

(a) Amplification curve of *Fad3* and *Gapdh*.

(b) Standard curve and equation of *Fad3* and *Gapdh*.

**Table S1. Ct values obtained from the *Fad3* and *Gapdh* standards and the corresponding copies by qPCR.**

| <b>Standard Samples</b> | <b>Mean Ct value</b> | <b>copies</b>      |
|-------------------------|----------------------|--------------------|
| $10^5$ - <i>Fad3</i>    | 25.94                | $1.00 \times 10^5$ |
| $10^6$ - <i>Fad3</i>    | 21.74                | $1.00 \times 10^6$ |
| $10^7$ - <i>Fad3</i>    | 17.15                | $1.00 \times 10^7$ |
| $10^8$ - <i>Fad3</i>    | 12.70                | $1.00 \times 10^8$ |
| $10^9$ - <i>Fad3</i>    | 8.80                 | $1.00 \times 10^9$ |
| $10^0$ - <i>Gapdh</i>   | 30.00                | $1.00 \times 10^0$ |
| $10^1$ - <i>Gapdh</i>   | 26.70                | $1.00 \times 10^1$ |
| $10^2$ - <i>Gapdh</i>   | 23.01                | $1.00 \times 10^2$ |
| $10^3$ - <i>Gapdh</i>   | 19.70                | $1.00 \times 10^3$ |
| $10^4$ - <i>Gapdh</i>   | 16.50                | $1.00 \times 10^4$ |

**Table S2. Ct Values and the copies of *Fad3* and *Gapdh* in the *Fad3* single and *Fad2-Fad3* double transgenic mice genome.**

| Genotype-<br>number |   | <i>Fad3</i> |           | <i>Gapdh</i> |          | The<br>copies of<br>transgeni<br>c mice |
|---------------------|---|-------------|-----------|--------------|----------|-----------------------------------------|
|                     |   | Average Ct  | Copies    | Average Ct   | Copies   |                                         |
| <i>Fad3-2</i>       | ♂ | 25.45       | 128394.09 | 16.43        | 9667.05  | 13.28                                   |
| <i>Fad3-4</i>       | ♀ | 26.72       | 65349.53  | 17.53        | 4589.49  | 14.24                                   |
| <i>Fad3-11</i>      | ♀ | 26.62       | 68918.72  | 15.96        | 13290.14 | 5.19                                    |
| <i>Fad2-Fad3-1</i>  | ♂ | 23.11       | 445615.96 | 14.75        | 30158.64 | 14.78                                   |
| <i>Fad2-Fad3-3</i>  | ♀ | 27.82       | 36408.34  | 16.65        | 8328.91  | 4.37                                    |
| <i>Fad2-Fad3-4</i>  | ♀ | 27.74       | 37990.65  | 16.78        | 7626.99  | 4.98                                    |
| <i>Fad2-Fad3-5</i>  | ♀ | 24.36       | 229233.00 | 15.59        | 17074.69 | 13.43                                   |
| <i>Fad2-Fad3-7</i>  | ♀ | 29.70       | 13397.41  | 18.93        | 1778.28  | 7.53                                    |

Table S3. PUFA compositions of seven major tissues in *Fad3* F0/F1 transgenic mice and wild-type mice.

| Fatty acids | Skeletal muscle         |                         |                         | Fat                     |                         |                         | Heart                   |                        |                         | Liver                   |                         |                         | Spleen                  |                         |                         | Lung                    |                         |                         | Kidney                 |                         |                         |
|-------------|-------------------------|-------------------------|-------------------------|-------------------------|-------------------------|-------------------------|-------------------------|------------------------|-------------------------|-------------------------|-------------------------|-------------------------|-------------------------|-------------------------|-------------------------|-------------------------|-------------------------|-------------------------|------------------------|-------------------------|-------------------------|
|             | WT (n=8)                | <i>Fad3</i> F0(n=3)     | <i>Fad3</i> F1(n=8)     | WT (n=8)                | <i>Fad3</i> F0(n=3)     | <i>Fad3</i> F1(n=8)     | WT (n=8)                | <i>Fad3</i> F0(n=3)    | <i>Fad3</i> F1(n=8)     | WT (n=8)                | <i>Fad3</i> F0(n=3)     | <i>Fad3</i> F1(n=8)     | WT (n=8)                | <i>Fad3</i> F0(n=3)     | <i>Fad3</i> F1(n=8)     | WT (n=8)                | <i>Fad3</i> F0(n=3)     | <i>Fad3</i> F1(n=8)     | WT (n=8)               | <i>Fad3</i> F0(n=3)     | <i>Fad3</i> F1(n=8)     |
| OA          | 24.32±2.99 <sup>a</sup> | 24.23±2.7 <sup>a</sup>  | 25.03±3.12 <sup>a</sup> | 28.01±3.14 <sup>a</sup> | 27.03±2.15 <sup>a</sup> | 26.93±4.32 <sup>a</sup> | 16.66±1.26 <sup>a</sup> | 14.98±0.6 <sup>a</sup> | 15.67±0.12 <sup>a</sup> | 17.78±1.23 <sup>a</sup> | 16.12±2.38 <sup>a</sup> | 15.89±1.34 <sup>a</sup> | 13.32±0.37 <sup>a</sup> | 12.05±1.29 <sup>a</sup> | 11.91±2.70 <sup>a</sup> | 12.21±1.14 <sup>a</sup> | 11.95±0.26 <sup>a</sup> | 12.57±3.11 <sup>a</sup> | 14.03±1.4 <sup>a</sup> | 13.76±2.01 <sup>a</sup> | 15.23±2.16 <sup>a</sup> |
| LA          | 12.03±0.42 <sup>a</sup> | 4.32±0.33 <sup>b</sup>  | 4.53±0.12 <sup>b</sup>  | 15.45±0.09 <sup>a</sup> | 6.33±0.27 <sup>b</sup>  | 5.64±0.47 <sup>b</sup>  | 8.74±0.04 <sup>a</sup>  | 5.43±0.18 <sup>b</sup> | 3.98±0.38 <sup>c</sup>  | 10.02±0.38 <sup>a</sup> | 5.73±0.29 <sup>b</sup>  | 6.00±0.35 <sup>b</sup>  | 6.54±0.49 <sup>a</sup>  | 4.32±0.13 <sup>b</sup>  | 3.23±0.46 <sup>c</sup>  | 6.56±0.73 <sup>c</sup>  | 3.53±0.59 <sup>b</sup>  | 3.05±0.54 <sup>b</sup>  | 7.84±0.31 <sup>a</sup> | 3.43±1.85 <sup>b</sup>  | 4.42±2.13 <sup>b</sup>  |
| γ-LA        | 0.32±0.02 <sup>a</sup>  | 0.18±0.02 <sup>b</sup>  | 0.23±0.04 <sup>b</sup>  | 0.24±0.02 <sup>a</sup>  | 0.11±0.01 <sup>b</sup>  | 0.05±0.04 <sup>b</sup>  | 0.23±0.01 <sup>a</sup>  | 0.09±0.02 <sup>b</sup> | 0.07±0.04 <sup>b</sup>  | 0.32±0.02 <sup>a</sup>  | 0.04±0.01 <sup>b</sup>  | 0.04±0.01 <sup>b</sup>  | 0.07±0.04 <sup>a</sup>  | 0.05±0.03 <sup>b</sup>  | 0.04±0.02 <sup>b</sup>  | 0.07±0.02 <sup>a</sup>  | 0.02±0.65 <sup>b</sup>  | 0.04±0.02 <sup>b</sup>  | 0.17±0.02 <sup>a</sup> | 0.02±0.01 <sup>b</sup>  | 0.02±0.01 <sup>b</sup>  |
| AA          | 1.21±0.42 <sup>a</sup>  | 0.93±0.49 <sup>b</sup>  | 0.73±0.04 <sup>b</sup>  | 2.31±0.50 <sup>a</sup>  | 1.12±0.03 <sup>b</sup>  | 1.32±0.30 <sup>b</sup>  | 1.18±0.22 <sup>a</sup>  | 0.33±0.08 <sup>b</sup> | 0.29±0.08 <sup>b</sup>  | 1.33±0.40 <sup>a</sup>  | 0.89±0.22 <sup>b</sup>  | 0.87±0.15 <sup>b</sup>  | 0.90±0.32 <sup>a</sup>  | 0.50±0.13 <sup>b</sup>  | 0.58±0.02 <sup>b</sup>  | 2.31±0.29 <sup>a</sup>  | 1.23±0.19 <sup>b</sup>  | 1.23±0.14 <sup>b</sup>  | 1.09±0.13 <sup>a</sup> | 0.42±0.12 <sup>b</sup>  | 0.37±0.11 <sup>b</sup>  |
| ALA         | 0.21±0.10 <sup>a</sup>  | 0.42±0.33 <sup>b</sup>  | 0.33±0.05 <sup>b</sup>  | 0.32±0.06 <sup>a</sup>  | 0.77±0.36 <sup>b</sup>  | 0.82±0.05 <sup>b</sup>  | 0.32±0.03 <sup>a</sup>  | 0.56±0.20 <sup>b</sup> | 0.78±0.12 <sup>b</sup>  | 0.23±0.03 <sup>a</sup>  | 0.44±0.22 <sup>b</sup>  | 0.53±0.23 <sup>b</sup>  | 0.12±0.03 <sup>a</sup>  | 0.33±0.07 <sup>b</sup>  | 0.21±0.01 <sup>b</sup>  | 0.22±0.08 <sup>a</sup>  | 0.53±0.11 <sup>b</sup>  | 0.45±0.03 <sup>b</sup>  | 0.56±0.09 <sup>a</sup> | 1.21±0.38 <sup>b</sup>  | 1.54±0.48 <sup>c</sup>  |
| EPA         | 0.44±0.02 <sup>a</sup>  | 0.78±0.2 <sup>b</sup>   | 0.87±0.03 <sup>b</sup>  | 0.12±0.03 <sup>a</sup>  | 0.44±0.22 <sup>b</sup>  | 0.36±0.13 <sup>b</sup>  | 0.13±0.05 <sup>a</sup>  | 0.30±0.09 <sup>b</sup> | 0.34±0.04 <sup>b</sup>  | 0.30±0.13 <sup>a</sup>  | 0.71±0.17 <sup>b</sup>  | 0.67±0.10 <sup>b</sup>  | 0.21±0.12 <sup>a</sup>  | 0.42±0.15 <sup>b</sup>  | 0.55±0.14 <sup>b</sup>  | 0.09±0.01 <sup>a</sup>  | 0.19±0.18 <sup>b</sup>  | 0.16±0.04 <sup>b</sup>  | 0.23±0.04 <sup>a</sup> | 0.42±0.20 <sup>b</sup>  | 0.32±0.45 <sup>b</sup>  |
| DHA         | 4.53±0.37 <sup>a</sup>  | 10.65±1.04 <sup>b</sup> | 8.75±0.63 <sup>b</sup>  | 7.04±0.32 <sup>a</sup>  | 12.03±0.73 <sup>b</sup> | 11.53±1.31 <sup>b</sup> | 3.22±0.54 <sup>a</sup>  | 8.80±0.57 <sup>b</sup> | 9.06±1.40 <sup>b</sup>  | 5.52±0.05 <sup>a</sup>  | 10.93±0.53 <sup>b</sup> | 8.97±1.02 <sup>b</sup>  | 2.39±0.61 <sup>a</sup>  | 4.23±0.15 <sup>b</sup>  | 5.43±0.12 <sup>b</sup>  | 3.56±0.07 <sup>a</sup>  | 6.97±0.39 <sup>b</sup>  | 9.65±1.22 <sup>c</sup>  | 3.49±0.62 <sup>a</sup> | 6.56±0.09 <sup>b</sup>  | 5.54±0.14 <sup>b</sup>  |
| n-6 total   | 13.56±0.86 <sup>a</sup> | 5.43±0.84 <sup>b</sup>  | 5.49±0.20 <sup>b</sup>  | 18.00±0.61 <sup>a</sup> | 7.56±0.31 <sup>b</sup>  | 7.01±0.81 <sup>b</sup>  | 10.15±0.27 <sup>a</sup> | 5.85±0.28 <sup>b</sup> | 4.34±0.50 <sup>b</sup>  | 11.67±2.30 <sup>a</sup> | 6.66±0.52 <sup>b</sup>  | 6.91±0.51 <sup>b</sup>  | 7.51±0.85 <sup>a</sup>  | 4.87±0.29 <sup>b</sup>  | 3.85±0.50 <sup>b</sup>  | 8.94±1.04 <sup>a</sup>  | 4.78±1.43 <sup>b</sup>  | 4.32±0.80 <sup>b</sup>  | 9.10±0.46 <sup>a</sup> | 3.87±1.98 <sup>b</sup>  | 4.81±2.25 <sup>b</sup>  |
| n-3 total   | 5.18±0.49 <sup>a</sup>  | 11.85±1.58 <sup>b</sup> | 9.95±0.71 <sup>b</sup>  | 7.48±0.41 <sup>a</sup>  | 13.24±1.31 <sup>b</sup> | 12.71±1.49 <sup>b</sup> | 3.67±0.62 <sup>a</sup>  | 9.66±0.86 <sup>b</sup> | 10.18±1.56 <sup>b</sup> | 6.05±0.21 <sup>a</sup>  | 12.08±0.92 <sup>b</sup> | 10.17±1.35 <sup>b</sup> | 2.72±0.76 <sup>a</sup>  | 4.98±0.37 <sup>b</sup>  | 6.19±0.27 <sup>c</sup>  | 3.87±0.16 <sup>a</sup>  | 7.69±0.68 <sup>b</sup>  | 10.26±1.29 <sup>c</sup> | 4.28±0.75 <sup>a</sup> | 8.19±0.67 <sup>b</sup>  | 7.40±1.07 <sup>b</sup>  |

WT: wild-type. Data are expressed as means ± S.D.; different superscript letters (a-c) represent statistical significant differences ( $P < 0.05$ ).

**Table S4.** PUFA compositions of seven major tissues in *Fad2-Fad3* F0/F1 transgenic mice and wild-type mice.

| Fatty acids | Skeletal muscle         |                          |                          | Fat                     |                          |                          | Heart                   |                          |                          | Liver                   |                          |                          | Spleen                  |                          |                          | Lung                    |                          |                          | Kidney                 |                          |                          |
|-------------|-------------------------|--------------------------|--------------------------|-------------------------|--------------------------|--------------------------|-------------------------|--------------------------|--------------------------|-------------------------|--------------------------|--------------------------|-------------------------|--------------------------|--------------------------|-------------------------|--------------------------|--------------------------|------------------------|--------------------------|--------------------------|
|             | WT (n=8)                | <i>Fad2-Fad3</i> F0(n=5) | <i>Fad2-Fad3</i> F1(n=8) | WT (n=8)                | <i>Fad2-Fad3</i> F0(n=5) | <i>Fad2-Fad3</i> F1(n=8) | WT (n=8)                | <i>Fad2-Fad3</i> F0(n=5) | <i>Fad2-Fad3</i> F1(n=8) | WT (n=8)                | <i>Fad2-Fad3</i> F0(n=5) | <i>Fad2-Fad3</i> F1(n=8) | WT (n=8)                | <i>Fad2-Fad3</i> F0(n=5) | <i>Fad2-Fad3</i> F1(n=8) | WT (n=8)                | <i>Fad2-Fad3</i> F0(n=5) | <i>Fad2-Fad3</i> F1(n=8) | WT (n=8)               | <i>Fad2-Fad3</i> F0(n=5) | <i>Fad2-Fad3</i> F1(n=8) |
| OA          | 24.32±2.99 <sup>a</sup> | 12.32±1.03 <sup>b</sup>  | 13.02±1.26 <sup>b</sup>  | 28.01±3.14 <sup>a</sup> | 10.03±1.06 <sup>c</sup>  | 12.21±1.73 <sup>b</sup>  | 16.66±1.26 <sup>a</sup> | 10.44±1.73 <sup>b</sup>  | 8.78±0.34 <sup>c</sup>   | 17.78±1.23 <sup>a</sup> | 8.47±2.03 <sup>b</sup>   | 8.34±0.43 <sup>b</sup>   | 13.32±0.37 <sup>a</sup> | 6.54±2.07 <sup>b</sup>   | 7.75±2.54 <sup>b</sup>   | 12.21±1.14 <sup>a</sup> | 4.33±0.41 <sup>b</sup>   | 3.23±0.02 <sup>b</sup>   | 14.03±1.4 <sup>a</sup> | 10.04±0.56 <sup>b</sup>  | 8.75±0.67 <sup>c</sup>   |
| LA          | 12.03±0.42 <sup>a</sup> | 15.01±1.17 <sup>b</sup>  | 15.65±0.21 <sup>b</sup>  | 15.45±0.09 <sup>a</sup> | 19.21±1.9 <sup>b</sup>   | 18.31±1.05 <sup>b</sup>  | 8.74±0.04 <sup>a</sup>  | 13.74±2.05 <sup>b</sup>  | 12.03±1.74 <sup>b</sup>  | 10.02±0.38 <sup>a</sup> | 14.01±2.03 <sup>b</sup>  | 15.04±1.03 <sup>b</sup>  | 6.54±0.49 <sup>a</sup>  | 9.98±1.32 <sup>b</sup>   | 9.34±0.55 <sup>b</sup>   | 6.56±0.73 <sup>a</sup>  | 10.22±0.89 <sup>b</sup>  | 9.49±1.30 <sup>b</sup>   | 7.84±0.31 <sup>a</sup> | 12.75±1.48 <sup>b</sup>  | 11.09±1.09 <sup>b</sup>  |
| γ-LA        | 0.32±0.02 <sup>a</sup>  | 1.21±0.05 <sup>b</sup>   | 1.53±0.03 <sup>c</sup>   | 0.24±0.02 <sup>a</sup>  | 0.41±0.38 <sup>b</sup>   | 0.44±0.12 <sup>b</sup>   | 0.23±0.01 <sup>a</sup>  | 0.60±0.41 <sup>b</sup>   | 0.41±0.03 <sup>b</sup>   | 0.32±0.02 <sup>a</sup>  | 0.65±0.21 <sup>b</sup>   | 0.43±0.12 <sup>b</sup>   | 0.07±0.04 <sup>a</sup>  | 0.12±0.08 <sup>a</sup>   | 0.23±0.05 <sup>b</sup>   | 0.07±0.02 <sup>a</sup>  | 0.13±0.01 <sup>a</sup>   | 0.14±0.01 <sup>b</sup>   | 0.17±0.02 <sup>a</sup> | 0.34±0.09 <sup>b</sup>   | 0.32±0.03 <sup>b</sup>   |
| AA          | 1.21±0.42 <sup>a</sup>  | 2.21±0.71 <sup>b</sup>   | 1.56±0.22 <sup>b</sup>   | 2.31±0.50 <sup>a</sup>  | 3.31±0.04 <sup>b</sup>   | 3.27±0.38 <sup>b</sup>   | 1.18±0.22 <sup>a</sup>  | 2.54±0.06 <sup>b</sup>   | 2.12±0.13 <sup>b</sup>   | 1.33±0.40 <sup>a</sup>  | 2.98±0.69 <sup>b</sup>   | 2.74±0.22 <sup>b</sup>   | 0.90±0.32 <sup>a</sup>  | 1.93±0.92 <sup>b</sup>   | 2.53±0.38 <sup>b</sup>   | 2.31±0.29 <sup>a</sup>  | 3.67±0.09 <sup>b</sup>   | 3.33±0.82 <sup>b</sup>   | 1.09±0.13 <sup>a</sup> | 1.71±0.19 <sup>b</sup>   | 1.76±0.22 <sup>b</sup>   |
| ALA         | 0.21±0.10 <sup>a</sup>  | 1.21±0.14 <sup>b</sup>   | 0.89±0.05 <sup>b</sup>   | 0.32±0.06 <sup>a</sup>  | 0.61±0.31 <sup>b</sup>   | 0.72±0.20 <sup>b</sup>   | 0.32±0.03 <sup>a</sup>  | 0.55±0.03 <sup>b</sup>   | 0.45±0.04 <sup>b</sup>   | 0.23±0.03 <sup>a</sup>  | 1.12±0.46 <sup>b</sup>   | 1.12±0.03 <sup>b</sup>   | 0.12±0.03 <sup>a</sup>  | 0.24±0.16 <sup>b</sup>   | 0.22±0.03 <sup>b</sup>   | 0.22±0.08 <sup>a</sup>  | 0.64±0.03 <sup>b</sup>   | 0.89±0.12 <sup>b</sup>   | 0.56±0.09 <sup>a</sup> | 1.98±0.13 <sup>b</sup>   | 1.78±0.06 <sup>b</sup>   |
| EPA         | 0.44±0.02 <sup>a</sup>  | 2.22±0.03 <sup>b</sup>   | 1.77±0.23 <sup>b</sup>   | 0.12±0.03 <sup>a</sup>  | 0.54±0.08 <sup>b</sup>   | 0.63±0.09 <sup>b</sup>   | 0.13±0.05 <sup>a</sup>  | 0.54±0.16 <sup>b</sup>   | 0.42±0.13 <sup>b</sup>   | 0.30±0.13 <sup>a</sup>  | 1.56±0.21 <sup>b</sup>   | 1.67±0.21 <sup>b</sup>   | 0.21±0.12 <sup>a</sup>  | 0.43±0.22 <sup>b</sup>   | 2.53±0.40 <sup>c</sup>   | 0.09±0.01 <sup>a</sup>  | 0.47±0.06 <sup>b</sup>   | 0.45±0.05 <sup>b</sup>   | 0.23±0.04 <sup>a</sup> | 0.63±0.09 <sup>b</sup>   | 0.76±0.20 <sup>b</sup>   |
| DHA         | 4.53±0.37 <sup>a</sup>  | 17.34±1.21 <sup>b</sup>  | 16.23±1.55 <sup>b</sup>  | 7.04±0.32 <sup>a</sup>  | 19.32±0.98 <sup>b</sup>  | 21.43±1.61 <sup>b</sup>  | 3.22±0.54 <sup>a</sup>  | 15.54±0.05 <sup>c</sup>  | 11.44±2.01 <sup>b</sup>  | 5.52±0.05 <sup>a</sup>  | 15.96±0.22 <sup>b</sup>  | 17.43±1.76 <sup>b</sup>  | 2.39±0.61 <sup>a</sup>  | 8.87±0.52 <sup>b</sup>   | 9.49±0.29 <sup>b</sup>   | 3.56±0.07 <sup>a</sup>  | 12.98±1.07 <sup>b</sup>  | 10.79±0.49 <sup>b</sup>  | 3.49±0.62 <sup>a</sup> | 12.94±1.08 <sup>b</sup>  | 15.68±0.17 <sup>c</sup>  |
| n-6 total   | 13.56±0.86 <sup>a</sup> | 18.43±1.93 <sup>b</sup>  | 18.74±0.46 <sup>b</sup>  | 18.00±0.61 <sup>a</sup> | 22.93±2.32 <sup>b</sup>  | 22.02±1.55 <sup>b</sup>  | 10.15±0.27 <sup>a</sup> | 16.88±2.52 <sup>b</sup>  | 14.56±1.90 <sup>b</sup>  | 11.67±2.30 <sup>a</sup> | 17.64±2.93 <sup>b</sup>  | 18.21±1.37 <sup>b</sup>  | 7.51±0.85 <sup>a</sup>  | 12.03±2.32 <sup>b</sup>  | 12.10±0.98 <sup>b</sup>  | 8.94±1.04 <sup>a</sup>  | 14.02±0.99 <sup>b</sup>  | 12.96±2.13 <sup>b</sup>  | 9.10±0.46 <sup>a</sup> | 14.8±1.76 <sup>b</sup>   | 13.17±1.34 <sup>b</sup>  |
| n-3 total   | 5.18±0.49 <sup>a</sup>  | 20.77±1.38 <sup>b</sup>  | 18.89±1.83 <sup>b</sup>  | 7.48±0.41 <sup>a</sup>  | 20.47±1.37 <sup>b</sup>  | 22.78±1.90 <sup>b</sup>  | 3.67±0.62 <sup>a</sup>  | 16.63±0.24 <sup>c</sup>  | 12.31±2.18 <sup>b</sup>  | 6.05±0.21 <sup>a</sup>  | 18.64±0.89 <sup>b</sup>  | 20.22±2.00 <sup>b</sup>  | 2.72±0.76 <sup>a</sup>  | 9.54±0.90 <sup>b</sup>   | 12.24±0.72 <sup>c</sup>  | 3.87±0.16 <sup>a</sup>  | 14.09±1.16 <sup>b</sup>  | 12.13±0.66 <sup>b</sup>  | 4.28±0.75 <sup>a</sup> | 15.55±1.30 <sup>b</sup>  | 18.22±0.43 <sup>b</sup>  |

WT: wild-type. Data are expressed as means ± S.D.; different superscript letters (a-c) represent statistical significant differences ( $P < 0.05$ ).

**Table S5. A tabulation of primer sequences.**

| Application                   | Gene                           | Sequence (5'-3')                                                     | Length   |
|-------------------------------|--------------------------------|----------------------------------------------------------------------|----------|
| Genes amplification           | <i>Fad3</i>                    | forward: AAAACTGTGGCTCTGCAGGA<br>reverse: CAGCCTGCATATATCAGAGC       | 1,233 bp |
|                               | <i>Fad2</i>                    | forward: CACACTTCGGCCTCTCCTTC<br>reverse: AAAATTCACAAATAATTGTGT      | 1,627 bp |
| Genotyping of transgenic mice | <i>Fad3</i>                    | forward: GTTCTGGGCAGTCTTTGTT<br>reverse: GGTACGGAACTTGGGAATA         | 865 bp   |
|                               | <i>Fad2</i>                    | forward: GCTGGAACAATGGGTGC<br>reverse: GCCAAGGGTTAGCGTCA             | 573 bp   |
| RT-PCR                        | <i>Fad3</i>                    | forward: CTCCAATGTTTGCTTATCC<br>reverse: CGAGCCATGCCACGAAT           | 235 bp   |
|                               | <i>Fad2</i>                    | forward: ACCATTGCGTTCCTCCTC<br>reverse: AAGCCAACAGTGTCATCG           | 191 bp   |
|                               | <i>Gapdh</i>                   | forward: GAGTGTTTCCTCGTCCCG<br>reverse: CCGTTGAATTTGCCGTGA           | 193 bp   |
| Detection of copy number      | <i>Fad3</i>                    | forward: AGCCGAAGAAATCAGGG<br>reverse: TTGGGAATATGTGGGTCAG           | 127 bp   |
|                               | <i>Gapdh</i>                   | forward: GGCCTCCAAGGAGTAAGAAA<br>reverse: GCCCCTCCTGTTATTATGG        | 141 bp   |
| qPCR                          | <i>Fasn</i>                    | forward: GGAGGTGGTGATAGCCGGTAT<br>reverse: TGGGTAATCCATAGAGCCCAG     | 140 bp   |
|                               | <i>Scd1</i>                    | forward: TTCTTGCGATACACTCTGGTGC<br>reverse: CGGGATTGAATGTTCTTGTCGT   | 98 bp    |
|                               | <i>Acc</i>                     | forward: ATGGGCGGAATGGTCTCTTTC<br>reverse: TGGGGACCTTGTCTTCATCAT     | 148 bp   |
|                               | <i>Lipe</i>                    | forward: CCAGCCTGAGGGCTTACTG<br>reverse: CTCCATTGACTGTGACATCTCG      | 106 bp   |
|                               | <i>Lpl</i>                     | forward: GGGAGTTTGGCTCCAGAGTTT<br>reverse: TGTGTCTTCAGGGGTCCTTAG     | 115 bp   |
|                               | <i>PPAR<math>\gamma</math></i> | forward: TCGCTGATGCACTGCCTATG<br>R: GAGAGGTCCACAGAGCTGATT            | 103 bp   |
|                               | <i>Lcad</i>                    | forward: TCTTTTCCTCGGAGCATGACA<br>reverse: GACCTCTCTACTCACTTCTCCAG   | 113 bp   |
|                               | <i>Fabp4</i>                   | forward: AAGGTGAAGAGCATCATAACCCT<br>reverse: TCACGCCTTTCATAACACATTCC | 133 bp   |
|                               | <i>Gapdh</i>                   | forward: GTGGCAAAGTGGAGATTGTTG<br>reverse: CTCCTGGAAGATGGTGATGG      | 164 bp   |
